# Supplementary material for: Ex Vivo Functional Assay for Evaluating Treatment Response in Tumor Tissue of Head and Neck Squamous Cell Carcinoma
Source: MDPI journal article supplement (doi:10.3390/cancers15020478), 2023-01-12
Supplement: s1 [file s1]

**Table S1.** Composition of culture media used in the optimization of culture conditions of HNSCC tumor slices. DMEM: Dulbecco modified Eagle's medium; FCS: fetal calf serum; P/S: penicillin and streptomycin; B27: B-27 supplement; EGF: epidermal growth factor; bFGF: basic fibroblast growth factor; aDMEM: advanced DMEM/F-12.

| Medium           | Composition                                                                                               |
|------------------|-----------------------------------------------------------------------------------------------------------|
| <b>OC1</b>       |                                                                                                           |
| No primocin      | DMEM + 10% FCS + P/S<br>DMEM + 10% FCS + P/S + B27 50x; EGF 20ng/ml; insulin 1:1000                       |
| Primocin         | DMEM + 10% FCS + P/S + primocin<br>DMEM + 10% FCS + P/S + B27 50x; EGF 20ng/ml; insulin 1:1000 + primocin |
| <b>OC 2 - 8</b>  |                                                                                                           |
| Medium 1         | DMEM + 0.5% BSA + P/S + primocin                                                                          |
| Medium 2         | DMEM + 0.5% BSA + P/S + B27 50x; EGF 40ng/ml; insulin 1:1000 + primocin                                   |
| Medium 3         | DMEM + 10% FCS + P/S + primocin                                                                           |
| Medium 4         | DMEM + 10% FCS + P/S + B27 50x; EGF 40ng/ml; insulin 1:1000 + primocin                                    |
| <b>OC 7 - 14</b> |                                                                                                           |
| Medium 5         | aDMEM + P/S + primocin                                                                                    |
| Medium 6         | aDMEM + P/S + B27 50x; EGF 20ng/ml; bFGF 20ng/ml; insulin 1:1000 + primocin                               |
| Medium 7         | aDMEM + P/S + EGF 20ng/ml; bFGF 20ng/ml + primocin                                                        |

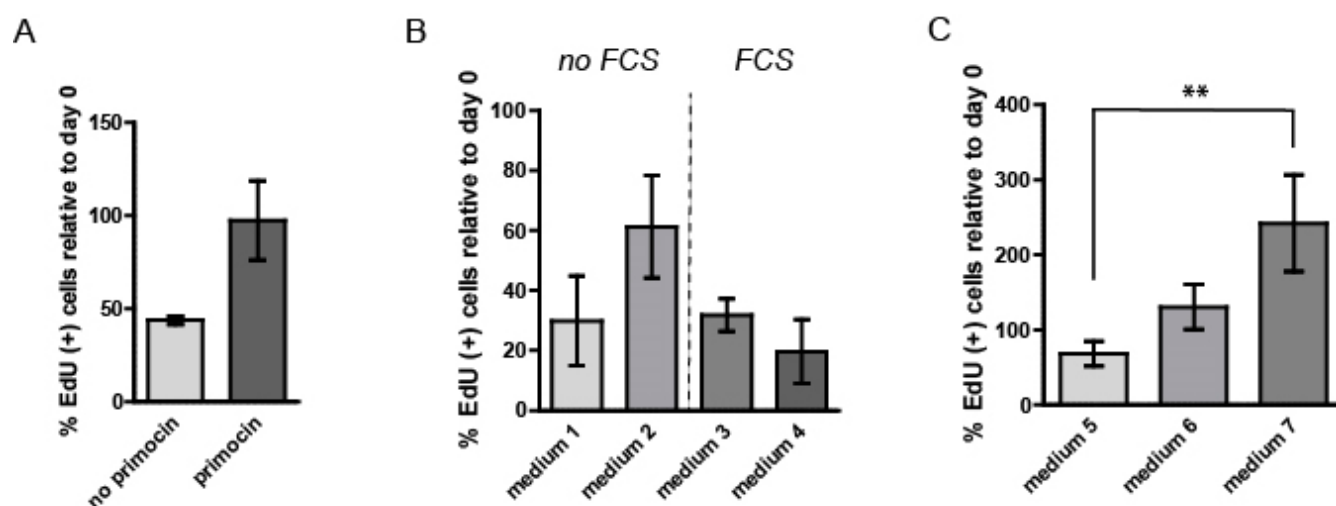

**Figure S1.** The effect of various culture media on the preservation of proliferation within HNSCC tumor slices during five days of culture. **(A)** Quantification of EdU positive cells in slices cultured in a medium with or without primocin. Bars show the mean of all slices ( $\geq 3$ ) cultured in a given medium and error bars indicate SEM. **(B)** Quantification of EdU positive cells in slices cultured in a medium with or without FCS. Bars show the mean of all slices ( $\geq 3$ ) cultured in a given medium and error bars indicate SEM. **(C)** Quantification of EdU positive cells in slices cultured in various aDMEM-based media. Bars show the mean of all slices ( $\geq 3$ ) cultured in a given medium and error bars indicate SEM. The exact medium composition can be found in Table S1. t-test has been used to assess significance. \*\*  $p < 0.001$ .

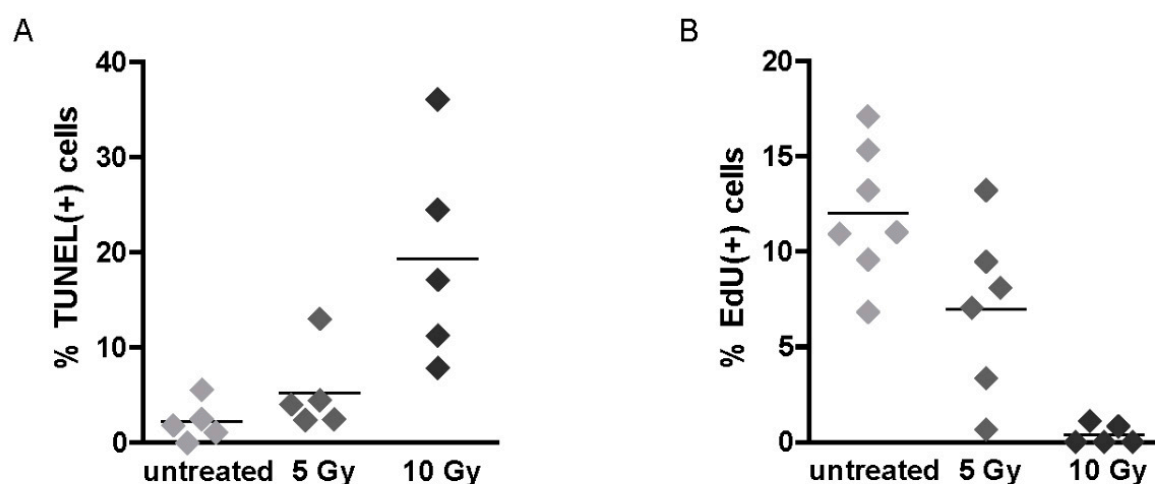

**Figure S2.** Irradiation with a single dose of 10 Gy induced marked apoptotic response and abolished proliferation in HNSCC tumor cells. **(A)** Quantification of TUNEL positive cells in untreated, and 5 Gy- or 10 Gy-treated samples at day 5 of the ex vivo culture. Each point represents the mean of  $\geq 5$  FoV per sample, and a mean across all samples per condition is indicated with a horizontal line. **(B)** Quantification of EdU positive cells in untreated, and 5 Gy- or 10 Gy-treated samples at day 5 of the ex vivo culture. Each point represents the mean of  $\geq 5$  FoV per sample, and a mean across all samples per condition is indicated with a horizontal line.
